# Supplementary material
Source: PubMed Central journal article supplement (PMC11301402)

figure S1

A

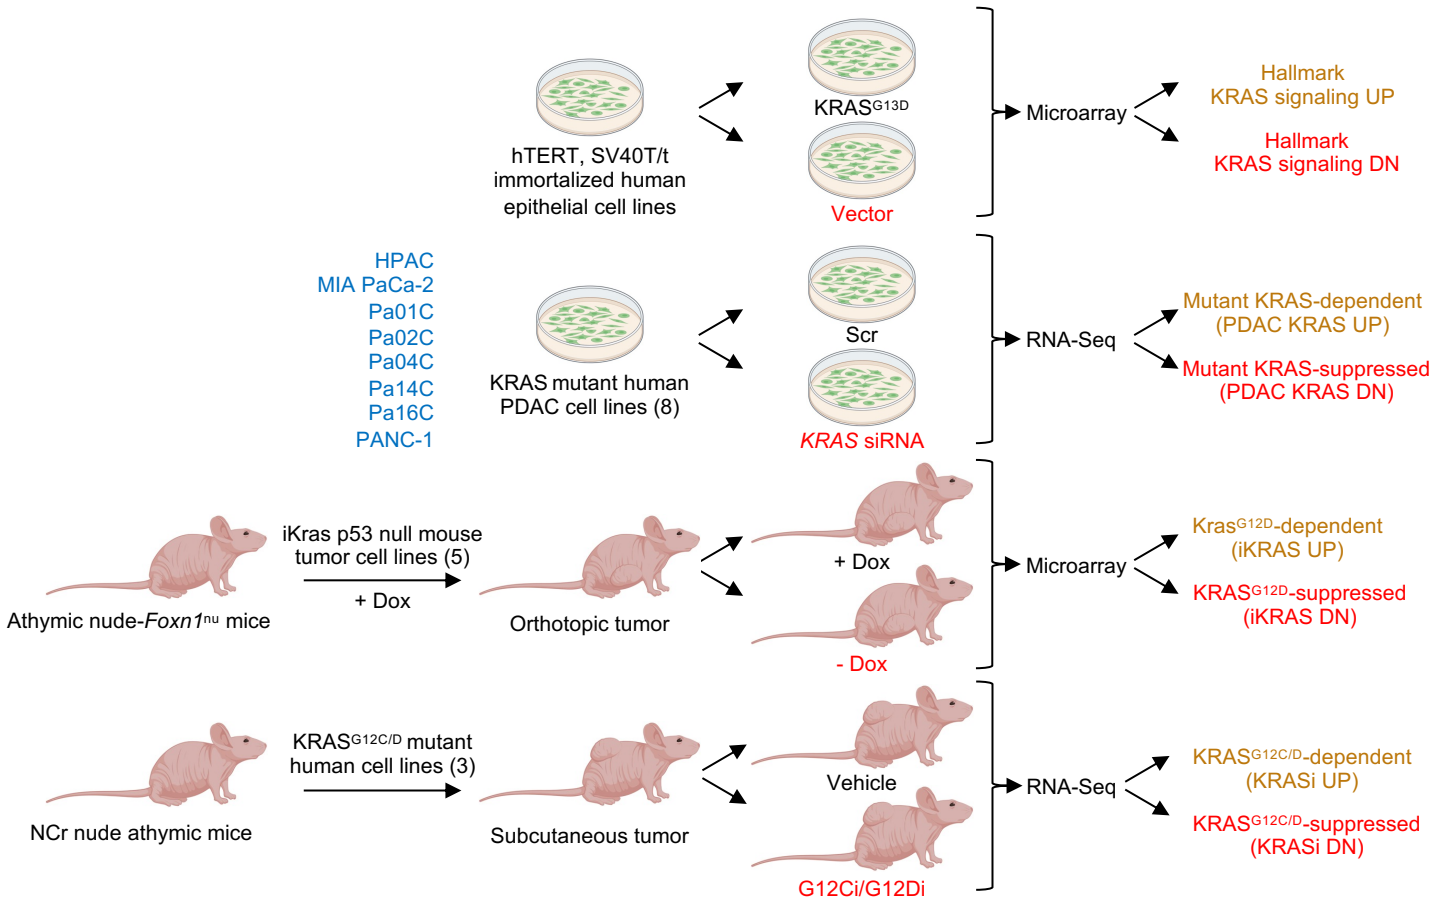

| Mutant KRAS-dependent transcriptome analyses                         |                                                                                                            |                                                                                           |            |                                                                                                                                                                   |                                                                                                                                                     |
|----------------------------------------------------------------------|------------------------------------------------------------------------------------------------------------|-------------------------------------------------------------------------------------------|------------|-------------------------------------------------------------------------------------------------------------------------------------------------------------------|-----------------------------------------------------------------------------------------------------------------------------------------------------|
| Study                                                                | PDAC model                                                                                                 | KRAS inhibition                                                                           | Method     | Strengths                                                                                                                                                         | Limitations                                                                                                                                         |
| Liberzon et al. (Cell Syst, 2015)                                    | Compiled from KRAS <sup>G13D</sup> overexpressing epithelial cells and correlated gene sets                | KRAS <sup>G13D</sup> overexpression                                                       | Microarray | <ul style="list-style-type: none"> <li>Emergent programming</li> <li>Mostly isogenic comparisons</li> </ul>                                                       | <ul style="list-style-type: none"> <li>Limited interpretation of founding gene sets</li> <li>Limited precision</li> </ul>                           |
| This study                                                           | KRAS-mutant PDAC cell lines                                                                                | KRAS targeted siRNA (24 h) and loss of KRAS gene and protein expression                   | RNA-Seq    | <ul style="list-style-type: none"> <li>Multiple (8) human PDAC cell lines reflect genetic heterogeneity of human PDAC</li> </ul>                                  | <ul style="list-style-type: none"> <li>In vitro cell culture environment</li> <li>Potential off-target siRNA activities</li> </ul>                  |
| Ying et al. (Cell, 2012)                                             | Doxycycline-inducible Kras <sup>G12D</sup> ; Tp53 <sup>-/-</sup> mouse cell line-induced orthotopic tumors | Doxycycline withdrawal (24 h) and loss of Kras <sup>G12D</sup> protein expression         | Microarray | <ul style="list-style-type: none"> <li>In vivo 3D tumor</li> <li>Pancreas stroma</li> <li>Regulation of mutant Kras expression</li> </ul>                         | <ul style="list-style-type: none"> <li>Mouse</li> <li>Genetic simplicity of PDAC tumors</li> <li>RNA quality</li> </ul>                             |
| Hallin et al. (Cancer Discov, 2020)<br>Hallin et al. (Nat Med, 2022) | KRAS <sup>G12C</sup> and KRAS <sup>G12D</sup> mutant human PDAC cell line-induced mouse xenograft tumors   | KRAS <sup>G12C/D</sup> inhibitor treatment (24 h) and inhibition of KRAS effector binding | RNA-Seq    | <ul style="list-style-type: none"> <li>In vivo 3D tumor; genetic heterogeneity of human PDAC</li> <li>Pharmacologic inhibition of mutant KRAS function</li> </ul> | <ul style="list-style-type: none"> <li>Subcutaneous nonphysiologic location</li> <li>Mouse stroma-containing tumors</li> <li>RNA quality</li> </ul> |

B

| PDAC cell line characteristics |                       |            |                                  |           |        |            |
|--------------------------------|-----------------------|------------|----------------------------------|-----------|--------|------------|
| Cell line                      | Driver gene mutations |            |                                  |           | Sex    | Site       |
|                                | KRAS                  | TP53       | CDKN2A                           | SMAD4     |        |            |
| AsPC-1                         | G12D <sup>a</sup>     | C135Afs*35 | L78Hfs*41                        | R100T     | Female | Metastatic |
| HPAC                           | G12D/WT               | WT         | E120Ter                          | D52N_fs*? | Female | Primary    |
| HPAF-II                        | G12D <sup>a</sup>     | P151S      | [R29G; A34V];L32_del_fs          | WT        | Male   | Metastatic |
| MIA PaCa-2                     | G12C <sup>a</sup>     | R248W      | Deletion                         | WT        | Male   | Primary    |
| Pa01C                          | G12D/WT               | T155P      | P70del_fs*74                     | Deletion  | Male   | Metastatic |
| Pa02C                          | Q61H <sup>a</sup>     | L257P      | Deletion                         | Deletion  | Male   | Metastatic |
| Pa04C                          | G12V <sup>a</sup>     | Deletion   | Deletion                         | WT        | Male   | Metastatic |
| Pa14C/Panc 08.13               | G12D/WT               | L344P      | [R87_F90_del_fs*54];[R87W; F90C] | WT        | Male   | Primary    |
| Pa16C/Panc 10.05               | G12D/WT               | I255N      | CDKN2A-201 expression loss       | WT        | Male   | Primary    |
| PANC-1                         | G12D/WT               | R273H      | Deletion                         | WT        | Male   | Primary    |
| SW1990                         | G12D <sup>a</sup>     | Q533Ter    | NA                               | NA        | Male   | Metastatic |

<sup>a</sup>Homozygous; NA, not available

figure S1

C

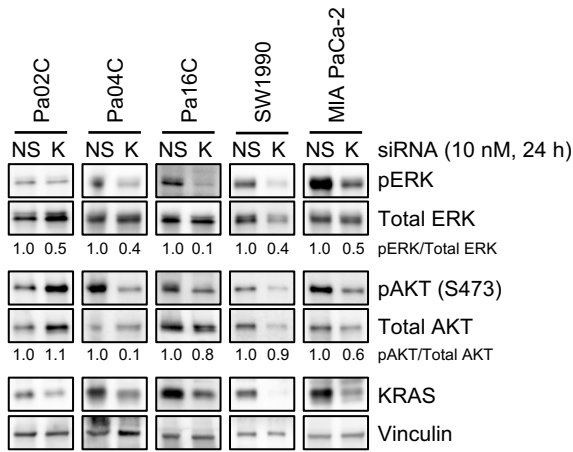

D

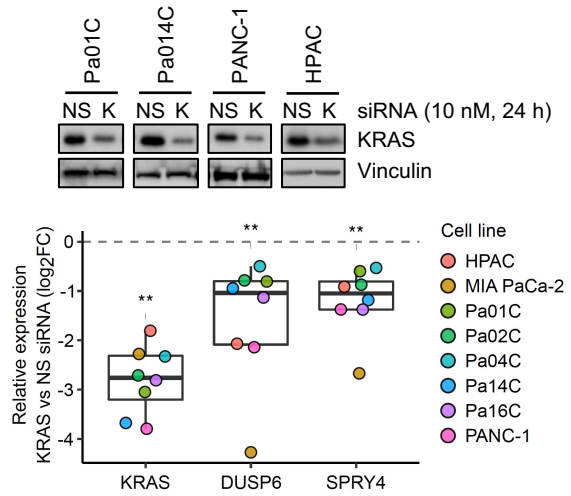

E

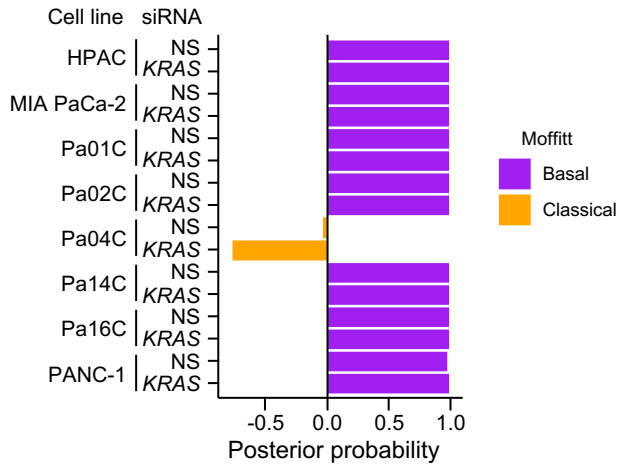

F

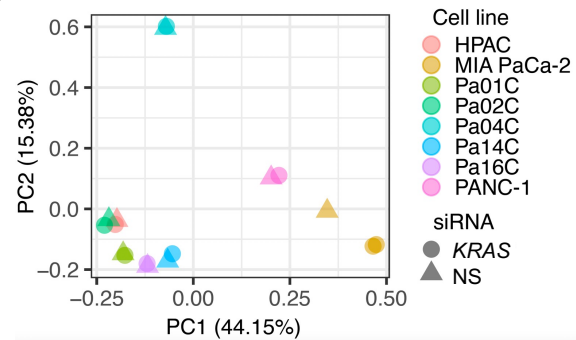

G

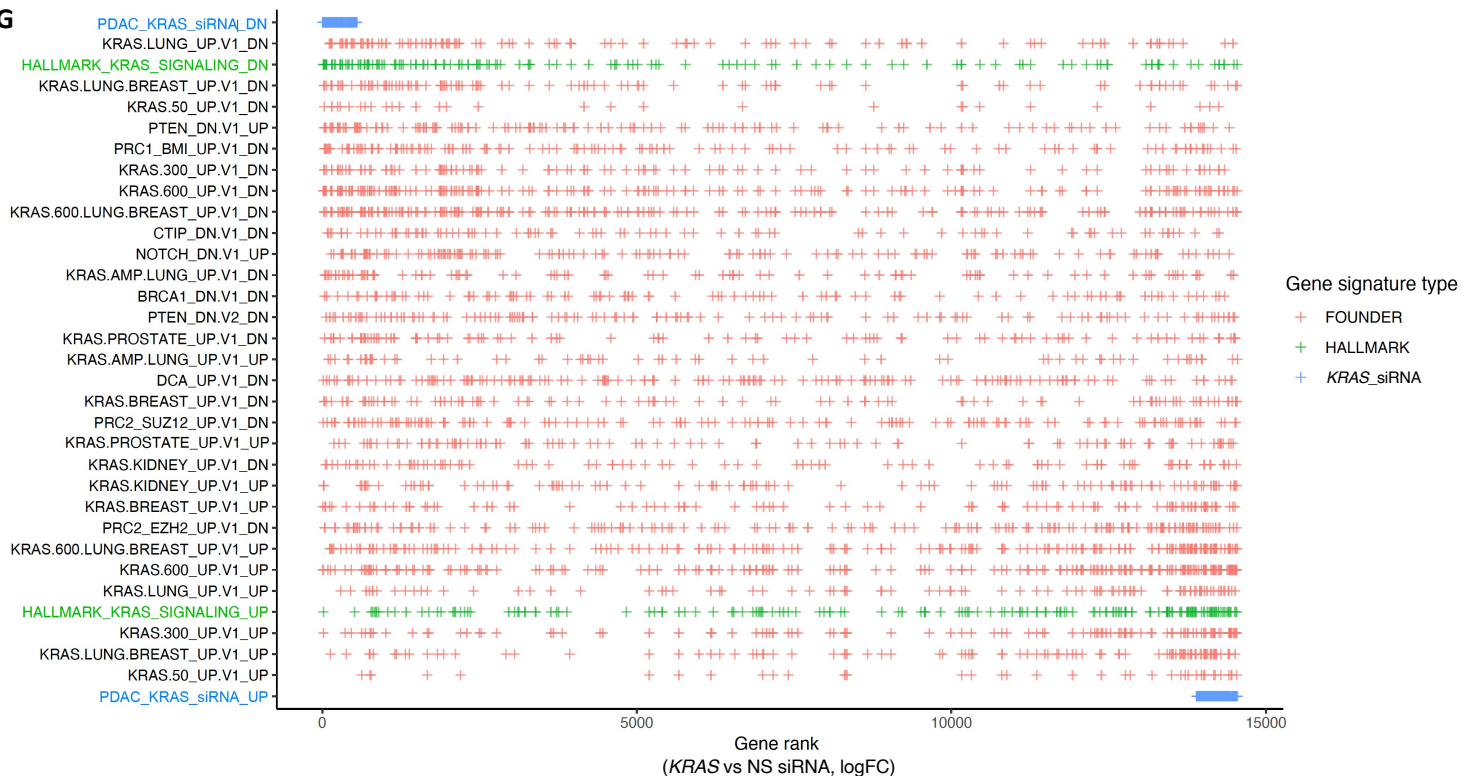

figure S1

H

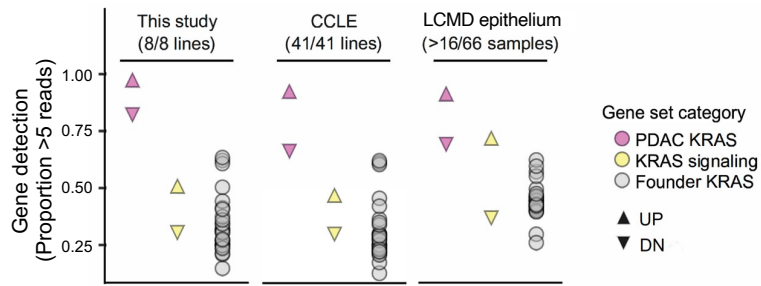

I

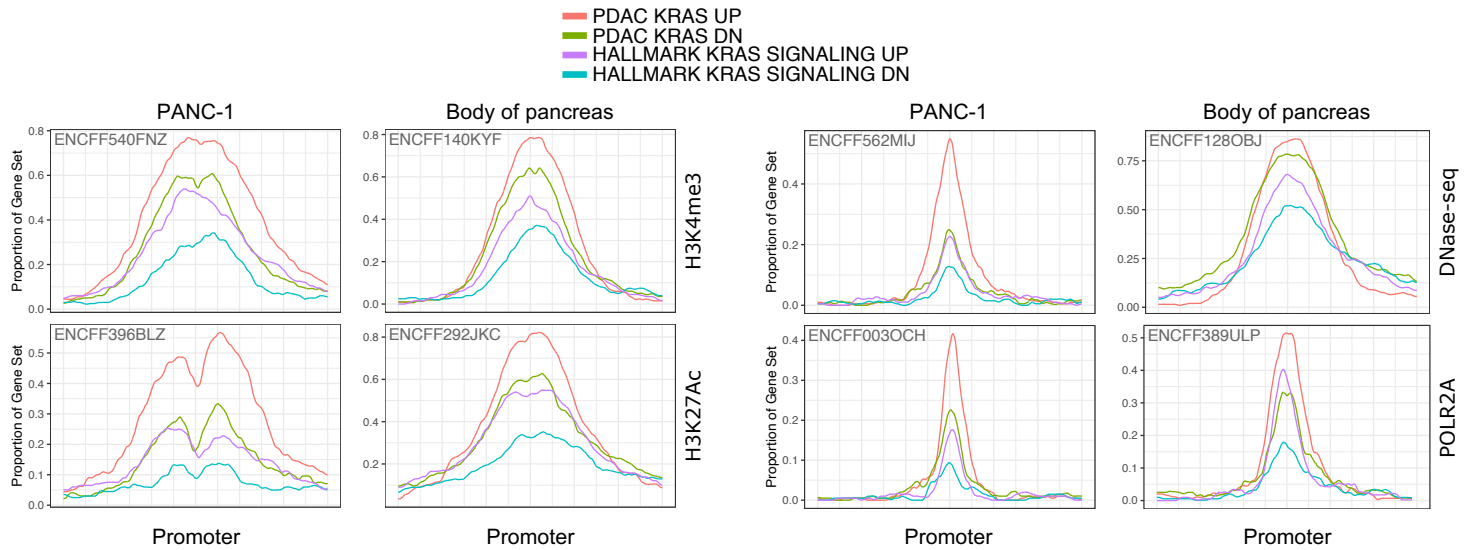

figure S1

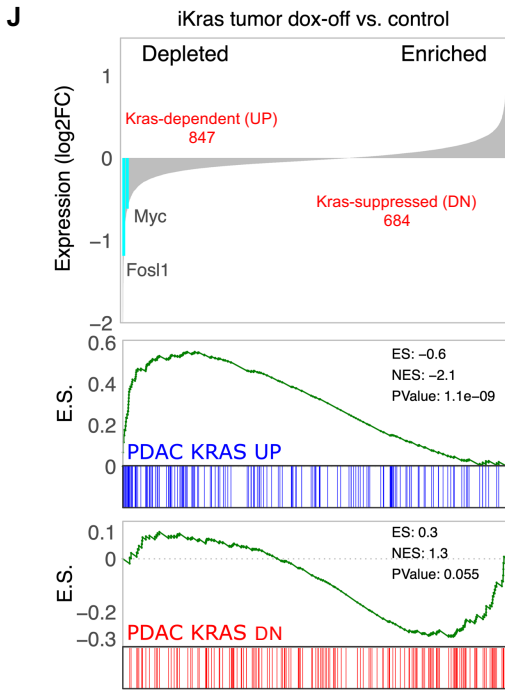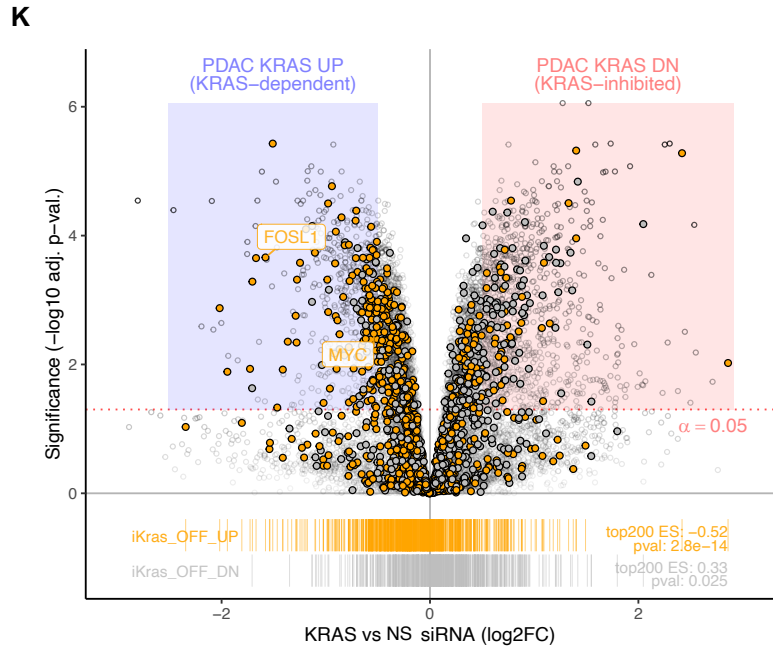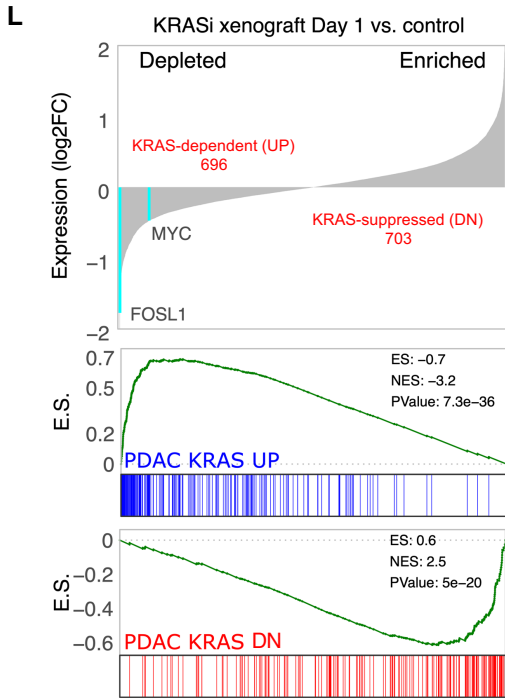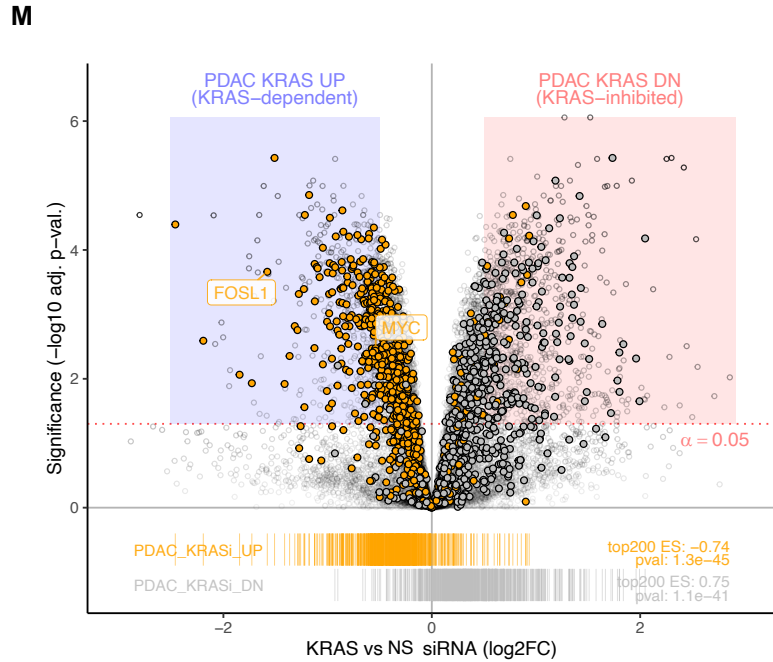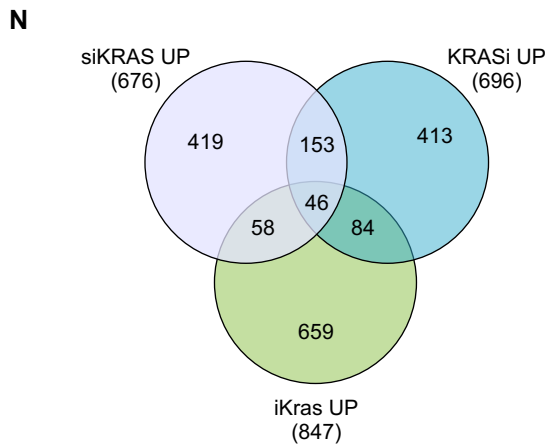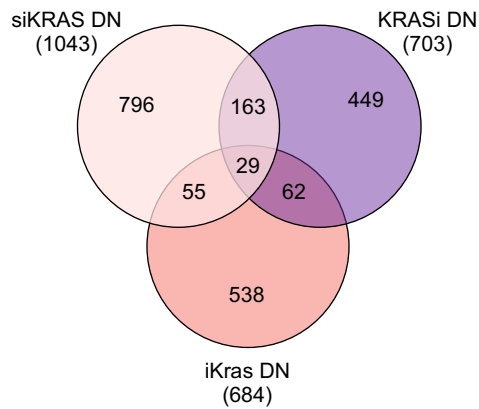

figure S1

O

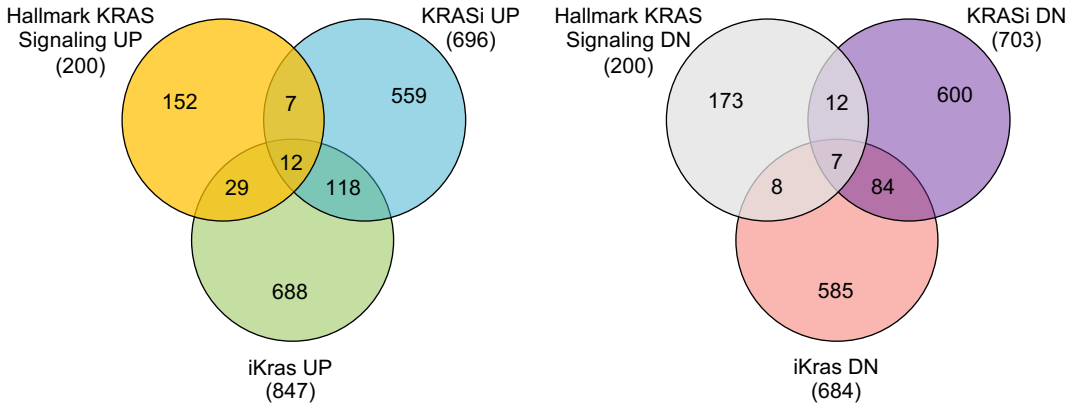

P

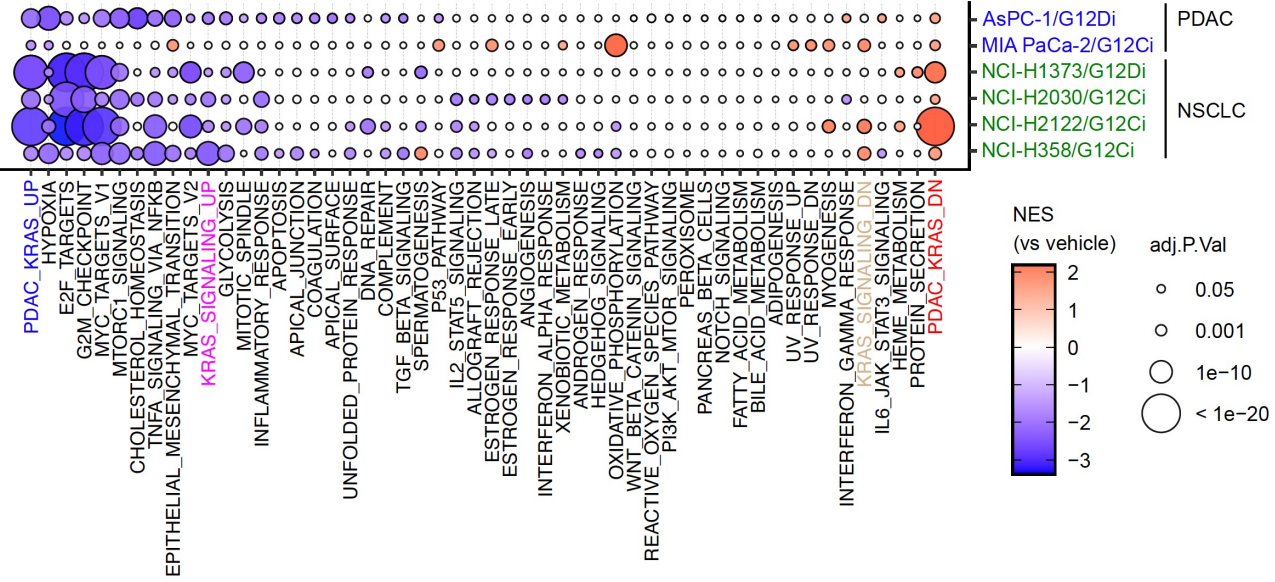

Supplement: NIHMS2007906-supplement-Figure_S1.pdf [file NIHMS2007906-supplement-Figure_S1.pdf]
