# Supplementary material
Source: PubMed Central journal article supplement (PMC11301402)

figure S2

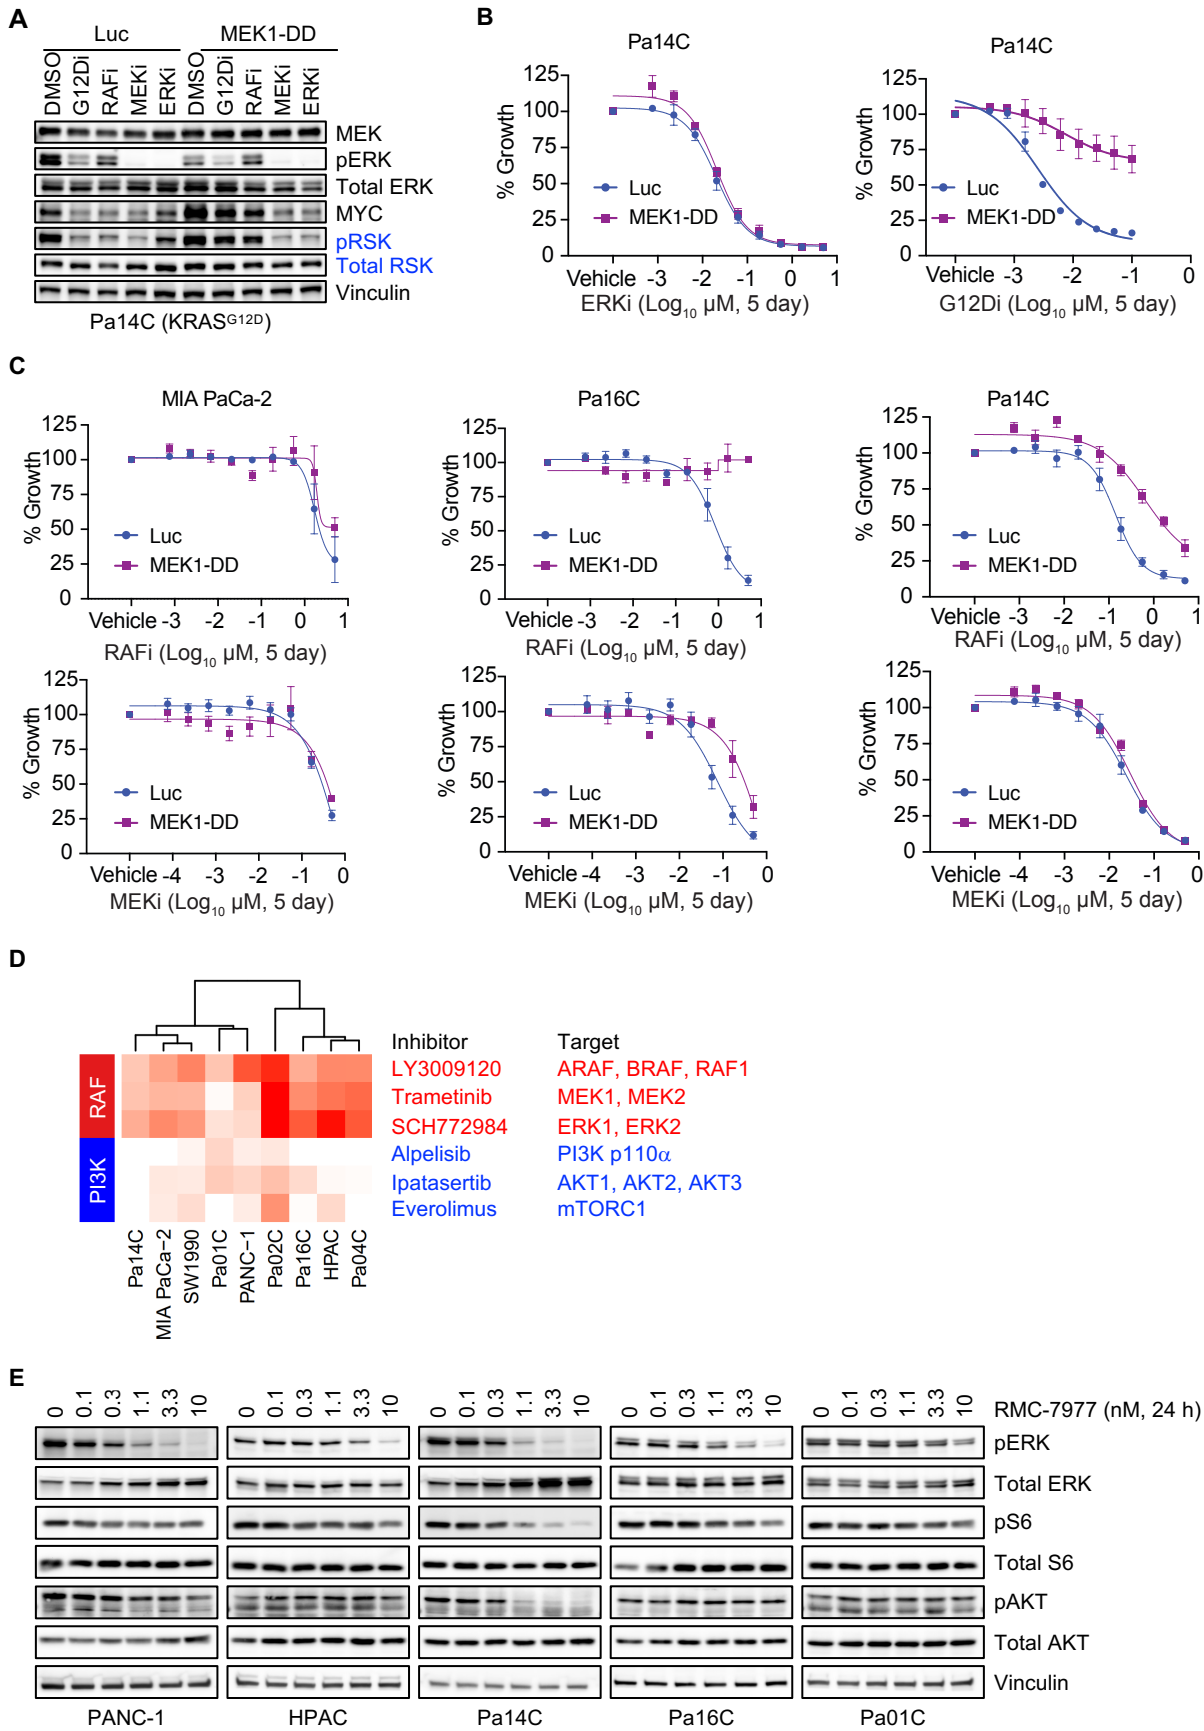

figure S2

F

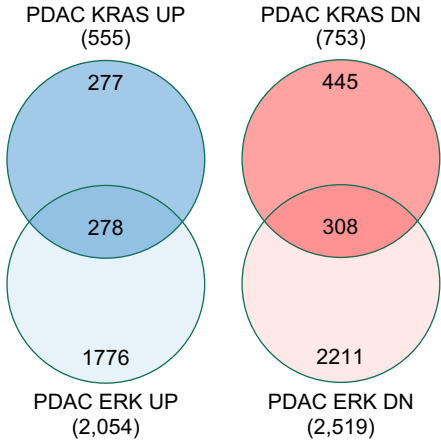

H

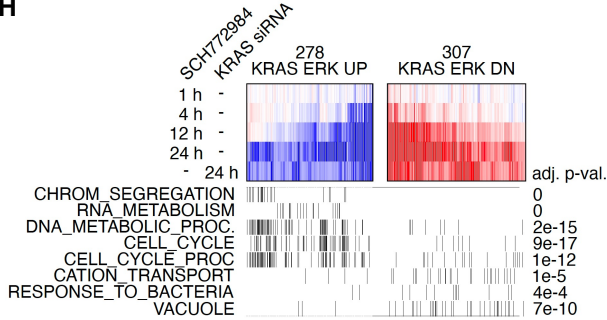

I

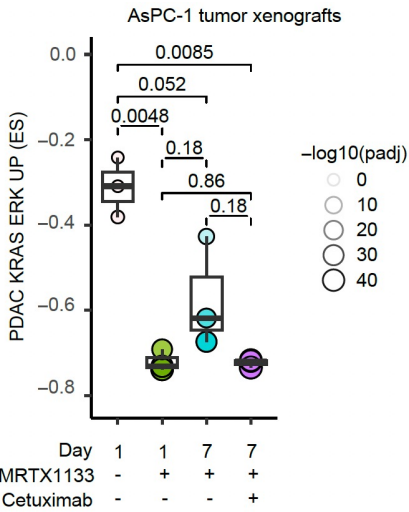

J

Median Rank siKRAS ERKi KRASi UP/DN top 200 gene sets

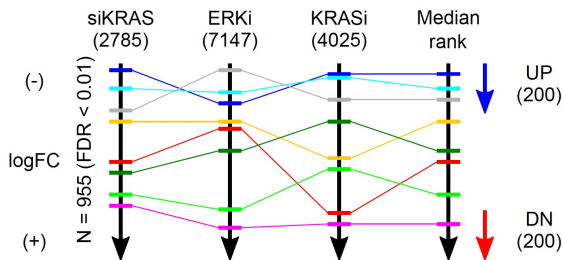

G

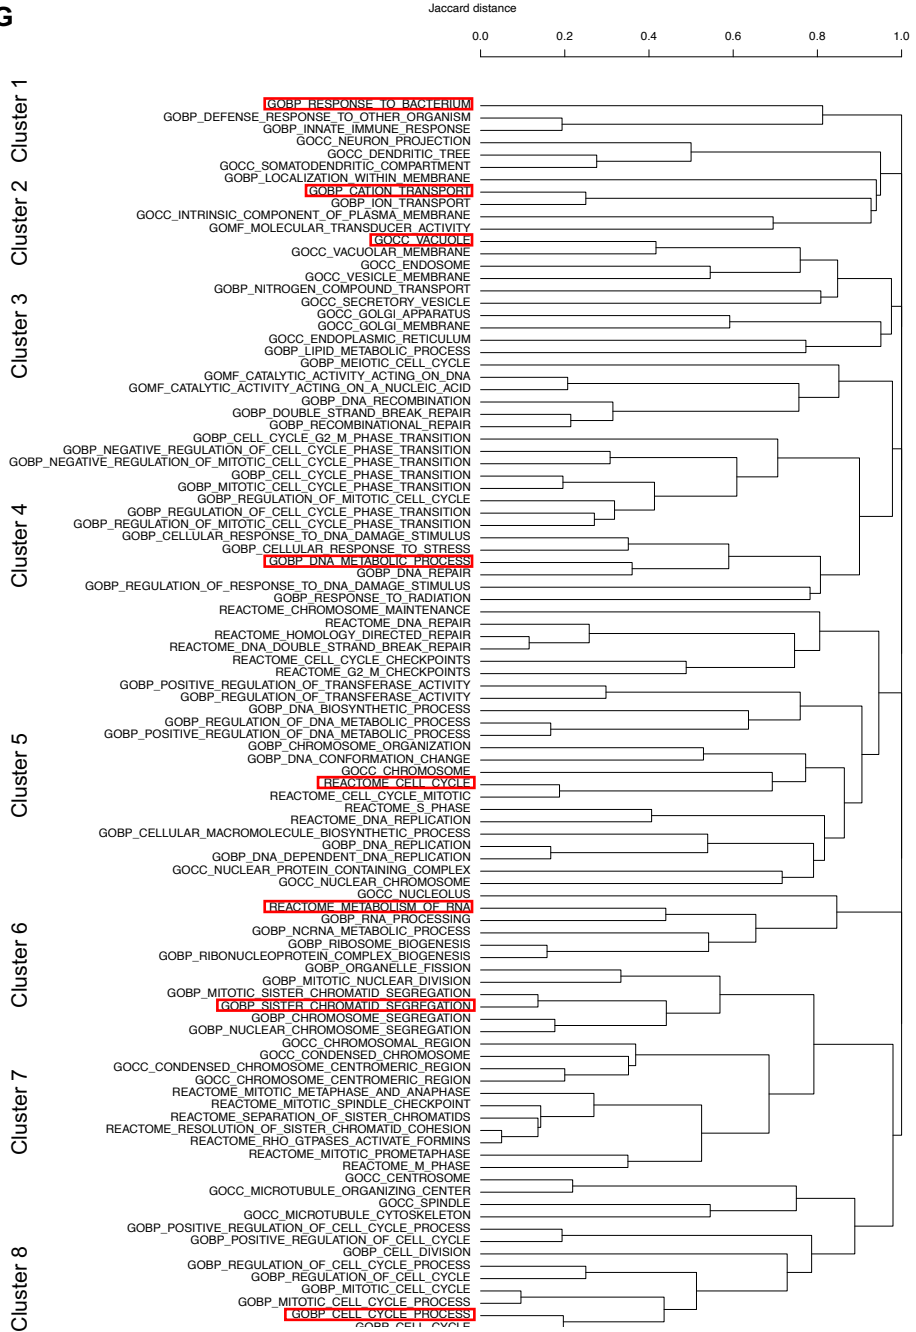

K

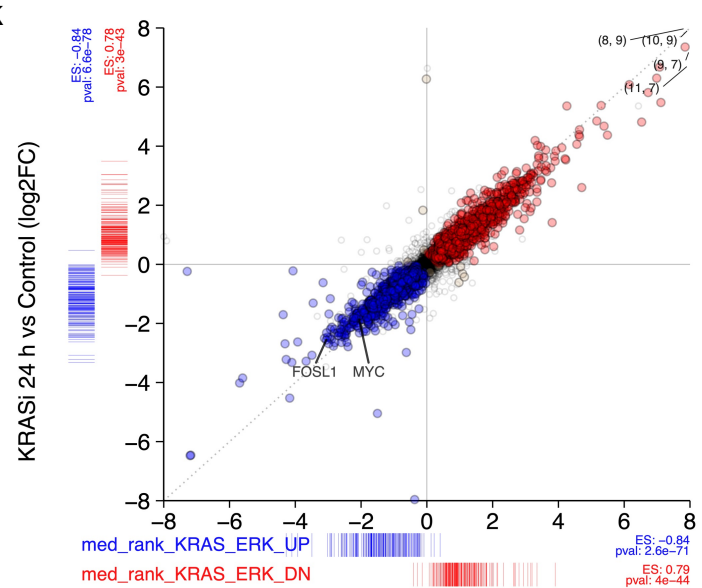

MEKi 24 h vs Control (log2FC)

figure S2

L

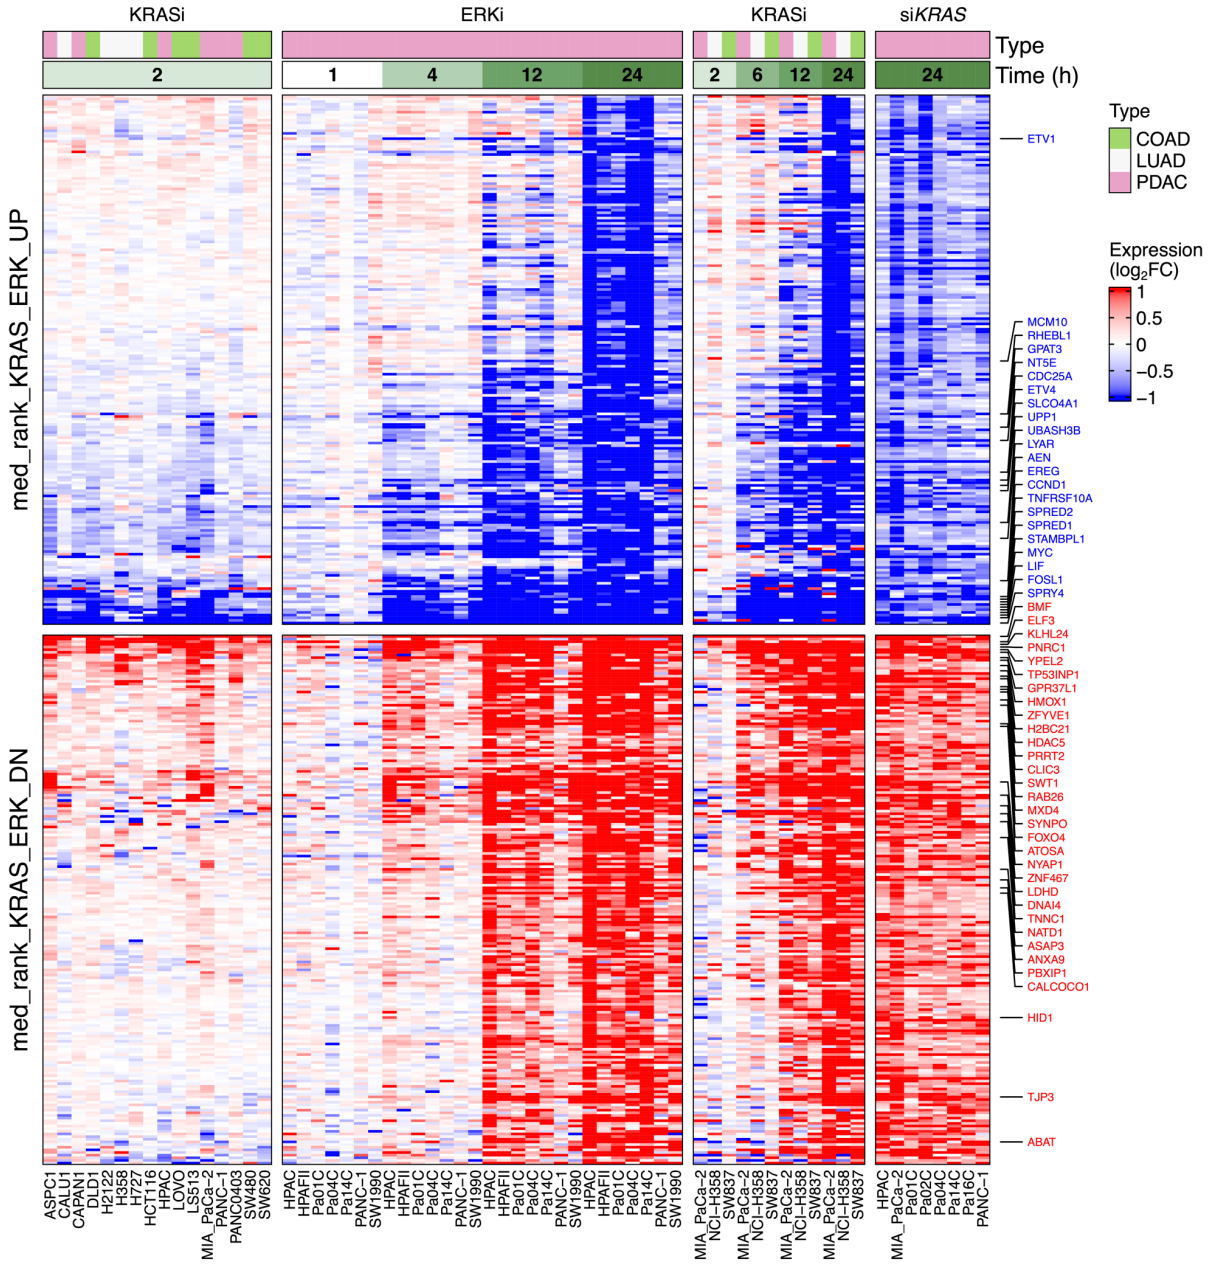

Supplement: NIHMS2007906-supplement-Figure_S2.pdf [file NIHMS2007906-supplement-Figure_S2.pdf]
