# Supplementary material
Source: PubMed Central journal article supplement (PMC11301402)

figure S3

A

Transcription factor motifs in ERK-dependent UP genes

| Rank | Motif | Name        | P-value | q-value (Benjamini) |
|------|-------|-------------|---------|---------------------|
| 1    |       | c-MYC(bHLH) | 1e-8    | 0.0000              |
| 2    |       | E2F7(E2F)   | 1e-7    | 0.0000              |
| 3    |       | n-MYC(bHLH) | 1e-6    | 0.0001              |
| 4    |       | c-MYC(bHLH) | 1e-5    | 0.0002              |
| 5    |       | CLOCK(bHLH) | 1e-5    | 0.0003              |
| 6    |       | MAX(bHLH)   | 1e-4    | 0.0049              |
| 7    |       | E2F4(E2F)   | 1e-3    | 0.0107              |
| 8    |       | E2F(E2F)    | 1e-3    | 0.0134              |
| 9    |       | MNT(bHLH)   | 1e-3    | 0.0134              |
| 10   |       | USF1(bHLH)  | 1e-3    | 0.0264              |

Total target sequences = 1,957; total background sequences = 922

B

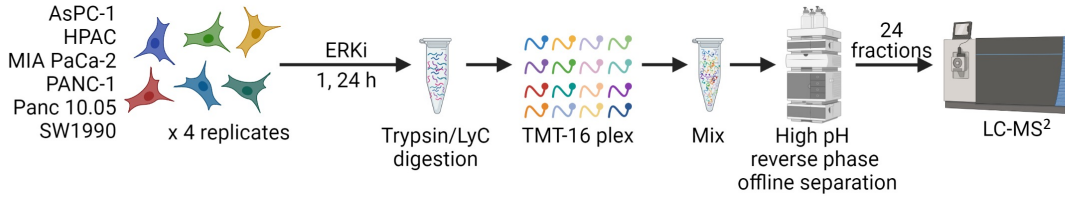

C

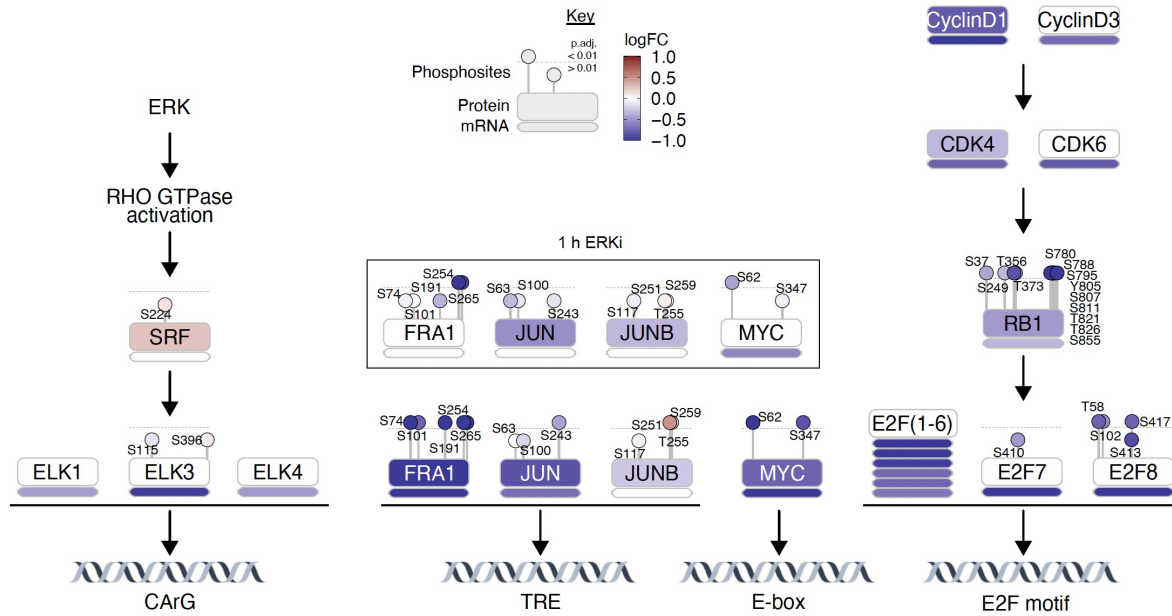

SRE, serum response element; TRE, TPA response element

figure S3

D

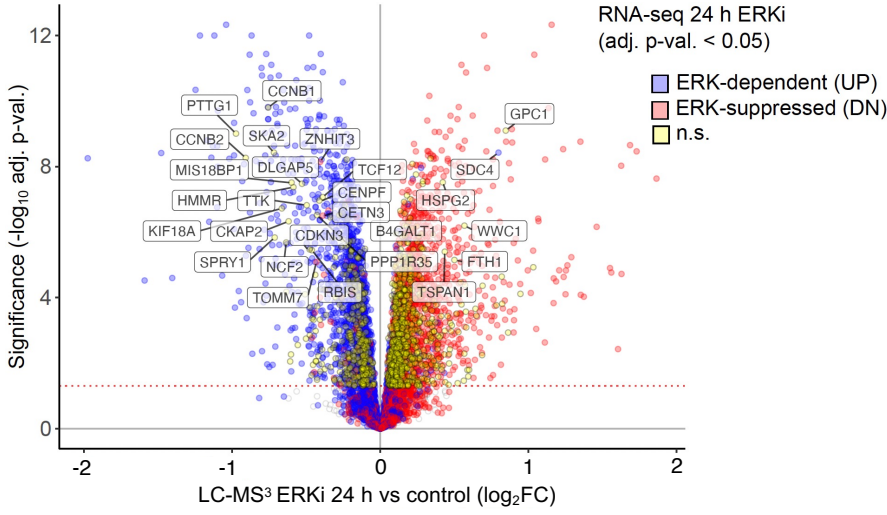

E

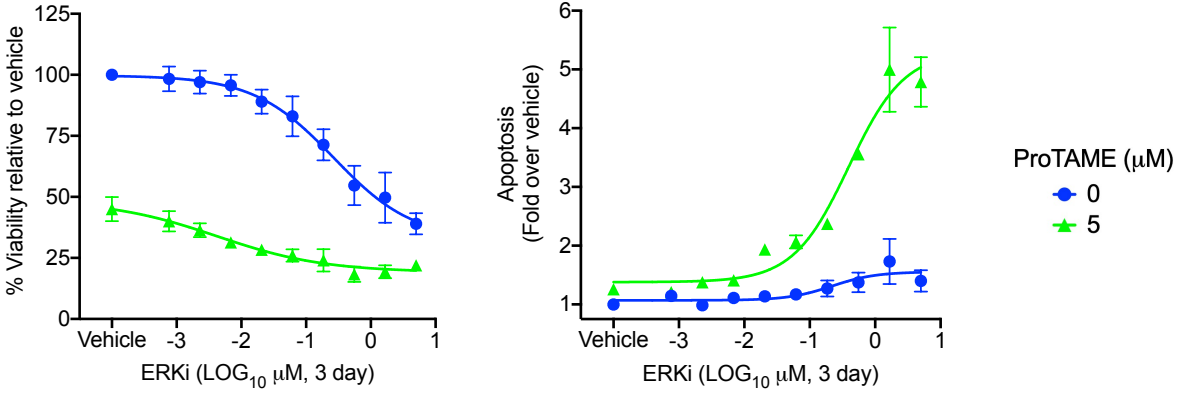

F

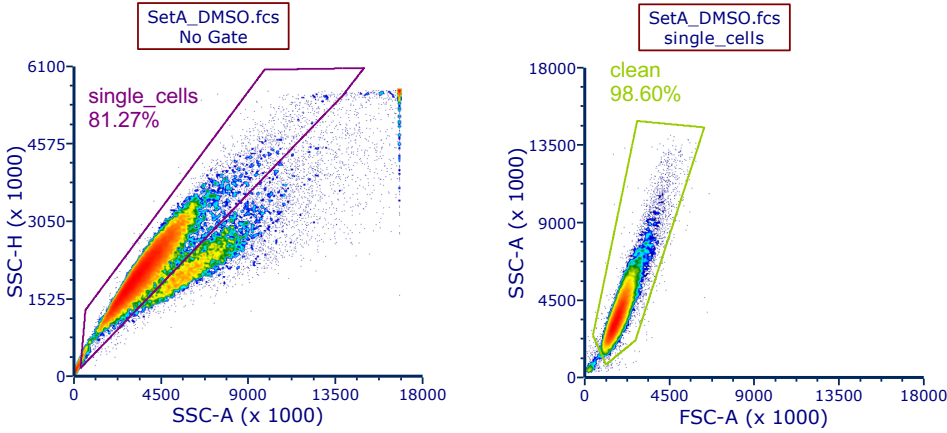

G

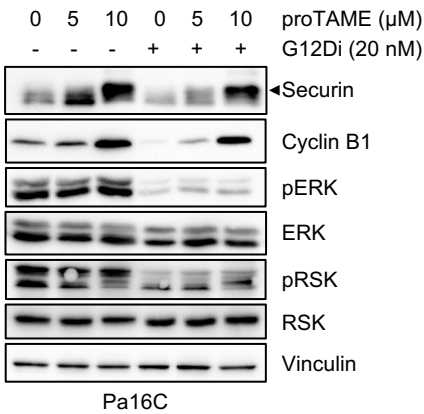

H

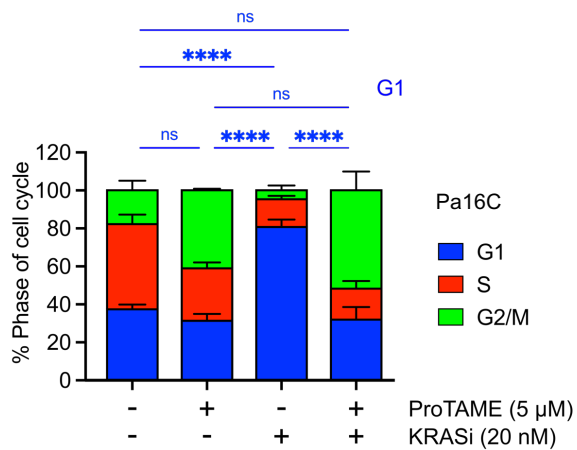

figure S3

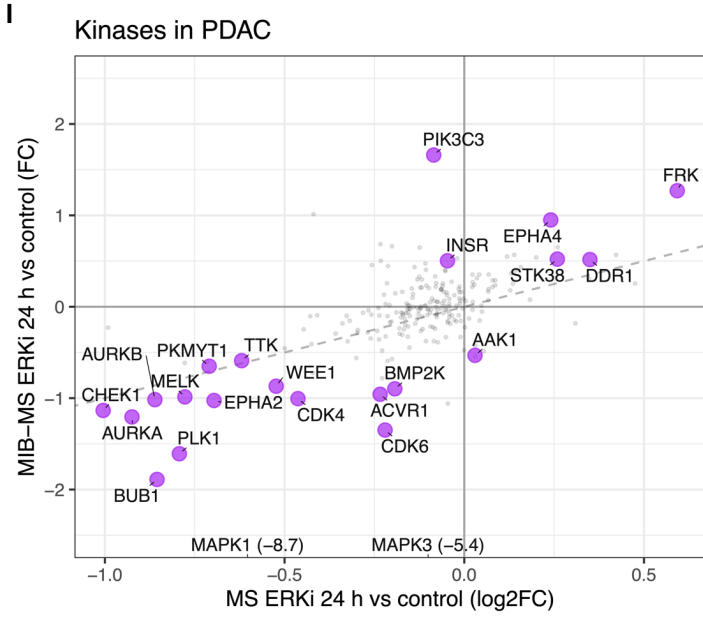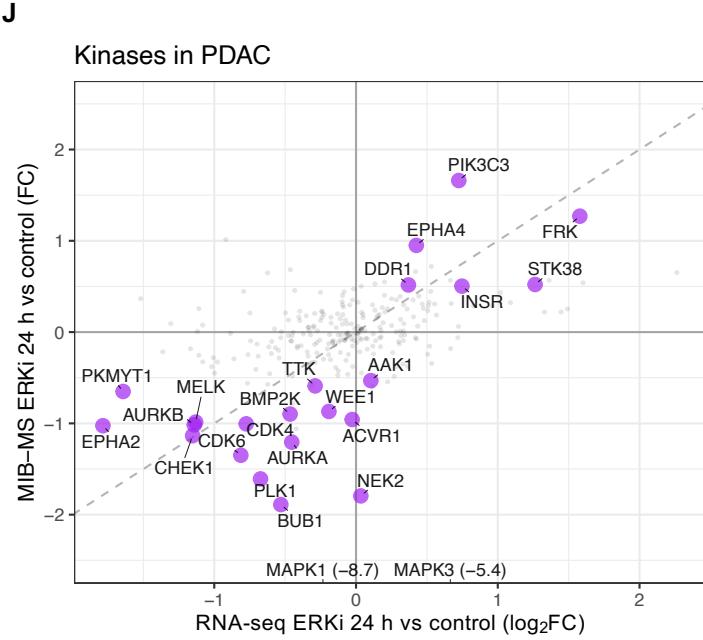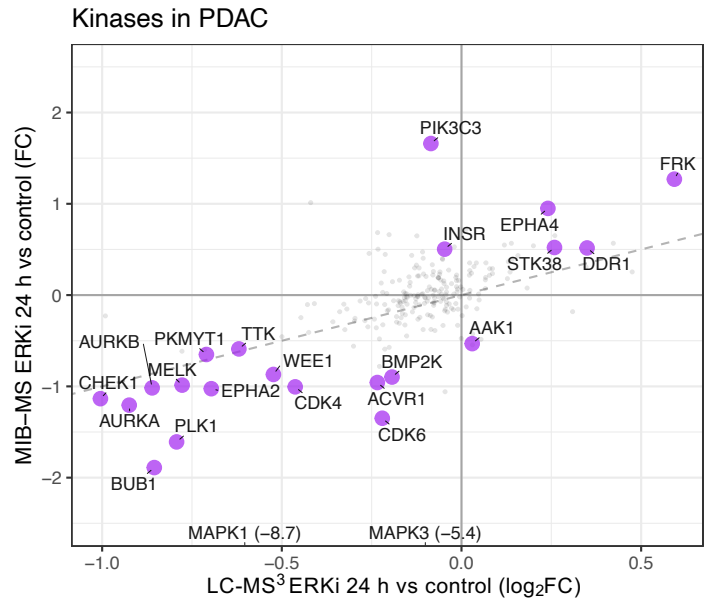

Supplement: NIHMS2007906-supplement-Figure_S3.pdf [file NIHMS2007906-supplement-Figure_S3.pdf]
