# Supplementary material
Source: PubMed Central journal article supplement (PMC11301402)

figure S4

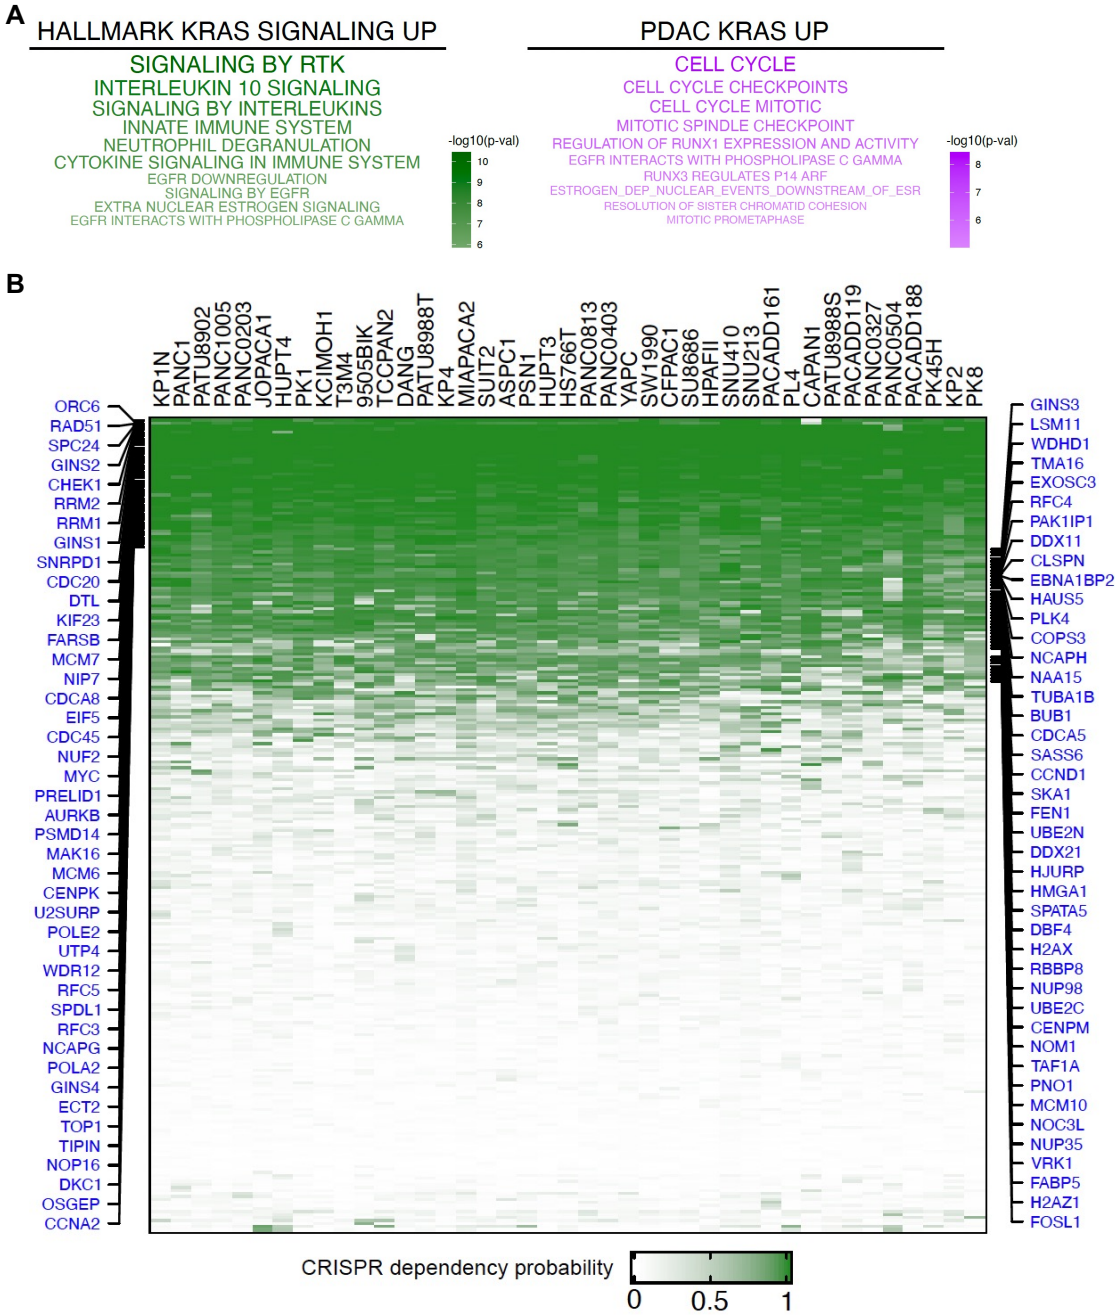

figure S4

C

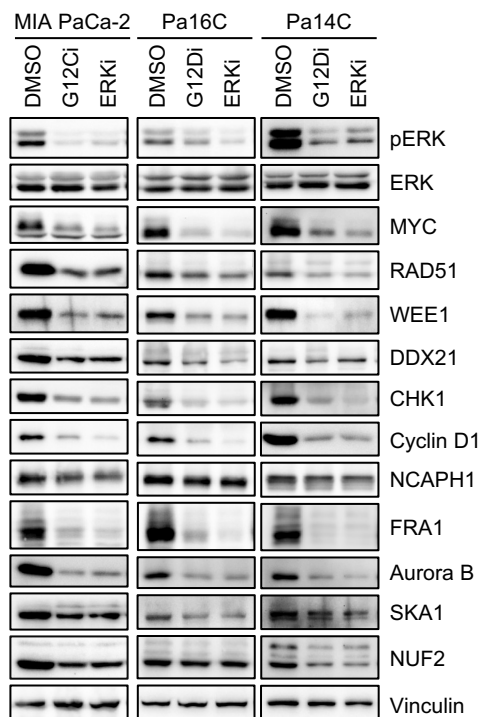

D

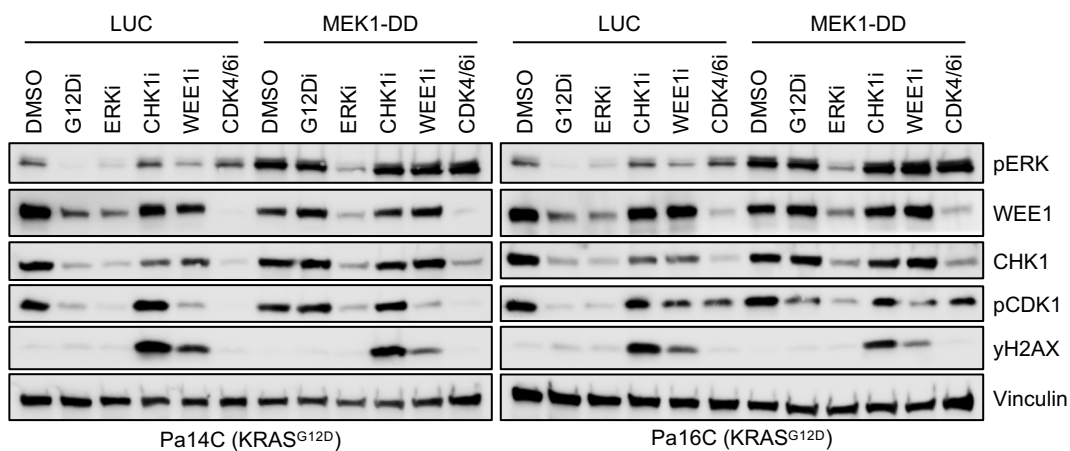

E

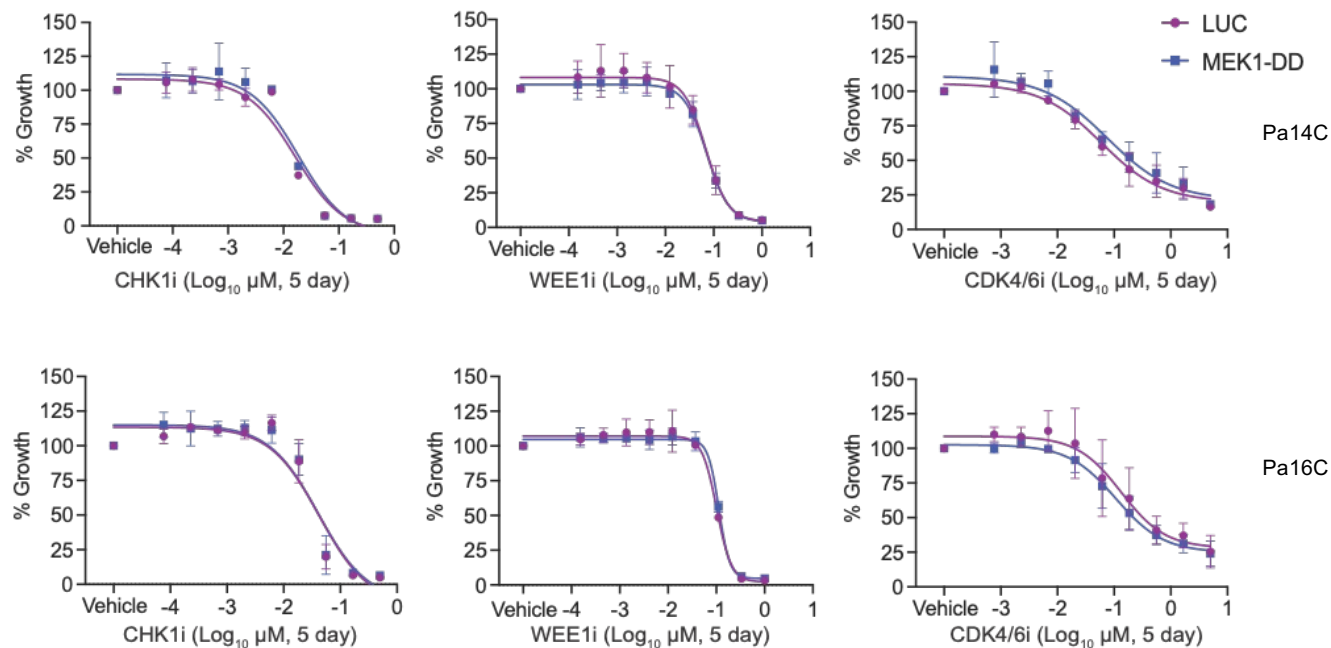

Supplement: NIHMS2007906-supplement-Figure_S4.pdf [file NIHMS2007906-supplement-Figure_S4.pdf]
